# Supplementary material for: Retracted Article: Milestone in the NTBphase investigation and beyond: direct insight into molecular self-assembly
Source: Royal Society of Chemistry journal article supplement (doi:10.1039/c4sm02119c), 2014-01-01
Supplement: c4sm02119c1.pdf [file c4sm02119c1.pdf]

## SUPPORTING INFORMATION

### **Milestone in the $N_{TB}$ Phase Investigation and Beyond: Direct Insight into Molecular Self-Assembly**

Trpimir Ivšić<sup>1</sup>, Marijana Vinković<sup>2</sup>, Ute Baumeister<sup>3</sup>, Ana Mikleušević<sup>1</sup> and Andreja Lesac<sup>1\*</sup>

<sup>1</sup>Division of Organic Chemistry and Biochemistry, Ruđer Bošković Institute, Bijenička cesta 54,  
10000 Zagreb, Croatia

<sup>2</sup>NMR Centre, Ruđer Bošković Institute, Bijenička cesta 54, 10000 Zagreb, Croatia

<sup>3</sup>Institute of Chemistry, Physical Chemistry, Martin Luther University Halle-Wittenberg, von-  
Danckelmann-Platz 4, 06120 Halle, Germany

\*Corresponding author: [andreja.lesac@irb.hr](mailto:andreja.lesac@irb.hr)

## X-Ray measurements

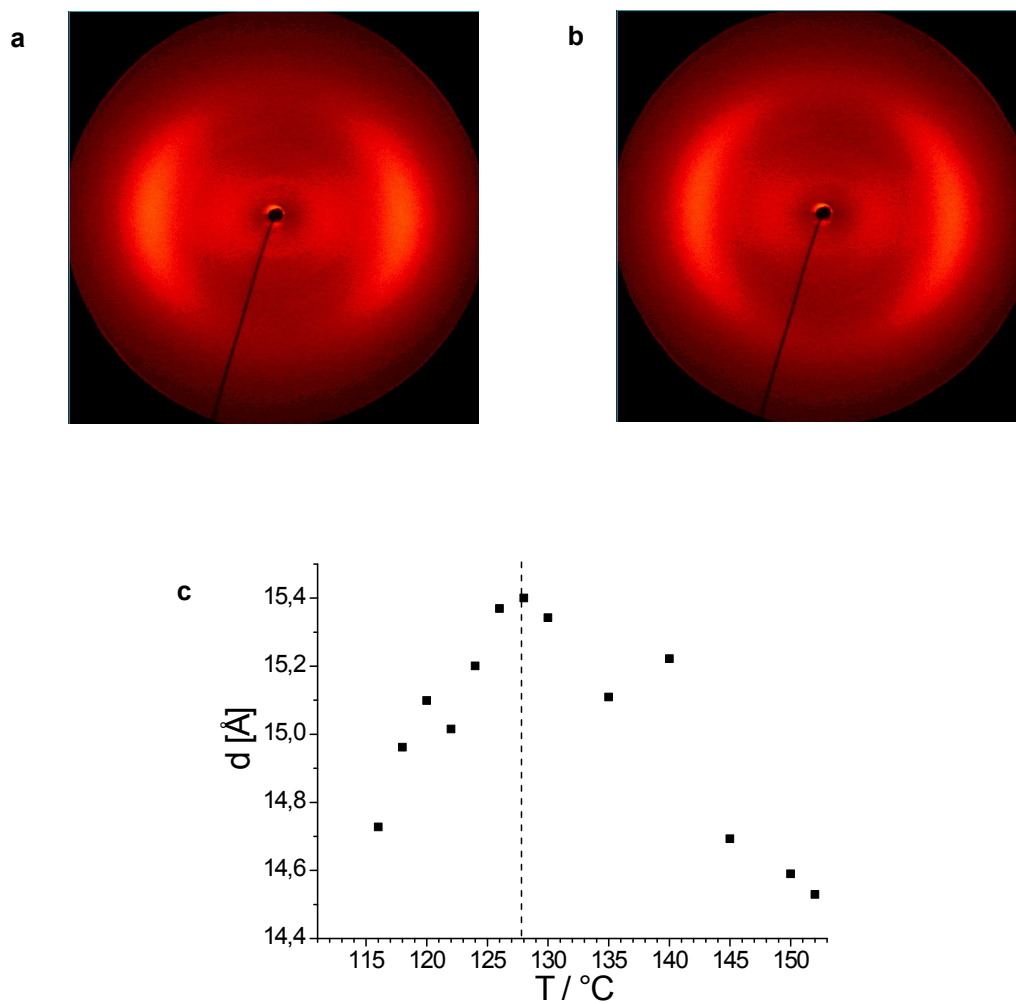

**Figure S1.** 2D XRD pattern of **CBI-9-ICB**; ( a) in the N phase at 150 °C, (b) in the N<sub>TB</sub> phase at 116 °C, (c) d value of the intensity maximum of the inner scattering at about 15 Å depending on the temperature

**Table S1:** Diffraction angles  $2\theta$  and  $d$  values for the intensity maxima of the small and wide angle X-ray diffraction of **CBI-7-ICB** and **CBI-9-ICB**

| $T/^\circ\text{C}$ | <b>CBI-7-ICB</b>  |                |                   |                | <b>CBI-9-ICB</b>  |                |                   |                |
|--------------------|-------------------|----------------|-------------------|----------------|-------------------|----------------|-------------------|----------------|
|                    | <b>inner halo</b> |                | <b>outer halo</b> |                | <b>inner halo</b> |                | <b>outer halo</b> |                |
|                    | $2\theta^\circ$   | $d/\text{\AA}$ | $2\theta^\circ$   | $d/\text{\AA}$ | $2\theta^\circ$   | $d/\text{\AA}$ | $2\theta^\circ$   | $d/\text{\AA}$ |
| 114                | 6.530             | 13.54          | 20.35             | 4.36           |                   |                |                   |                |
| 116                | 6.528             | 13.54          | 20.31             | 4.37           | 6.001             | 14.73          | 20.33             | 4.37           |
| 118                | 6.443             | 13.72          | 20.31             | 4.37           | 5.907             | 14.96          | 20.24             | 4.39           |
| 120                | 6.330             | 13.96          | 20.27             | 4.38           | 5.853             | 15.10          | 20.26             | 4.38           |
| 122                | 6.294             | 14.04          | 20.27             | 4.38           | 5.886             | 15.02          | 20.26             | 4.38           |
| 124                | 6.303             | 14.02          | 20.31             | 4.37           | 5.814             | 15.20          | 20.24             | 4.39           |
| 126                | 6.252             | 14.14          | 20.25             | 4.38           | 5.750             | 15.37          | 20.24             | 4.39           |
| 128                |                   |                |                   |                | 5.739             | 15.40          | 20.20             | 4.39           |
| 130                | 6.319             | 13.99          | 20.21             | 4.39           | 5.760             | 15.34          | 20.22             | 4.39           |
| 135                | 6.310             | 14.01          | 20.17             | 4.40           | 5.849             | 15.11          | 20.13             | 4.41           |
| 140                | 6.355             | 13.91          | 20.12             | 4.41           | 5.806             | 15.22          | 20.06             | 4.43           |
| 145                | 6.402             | 13.81          | 20.06             | 4.43           | 6.015             | 14.69          | 20.07             | 4.42           |
| 148                | 6.469             | 13.66          | 20.00             | 4.44           |                   |                |                   |                |
| 150                |                   |                |                   |                | 6.058             | 14.59          | 19.95             | 4.45           |
| 152                |                   |                |                   |                | 6.083             | 14.53          | 20.00             | 4.44           |

### Liquid state NMR measurements.

Complete assignment of the compound **BB\_7-4** is based on 1D and 2D homo- and heteronuclear NMR spectra and shown in Table S2. The spectra were taken at 50 °C due to low solubility of compound in DMSO- $d_6$  at room temperature.

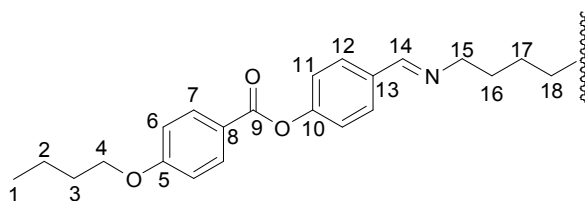

**Table S2.**  $^1\text{H}$  and  $^{13}\text{C}$  NMR chemical shifts ( $\delta/\text{ppm}$ )<sup>a</sup> recorded in DMSO- $d_6$  solution, H-H and C-H coupling constants<sup>b</sup> of compound **BB\_7-4** in (50 °C) and  $^1\text{H}$  chemical shifts of the neat compound in the  $N_{\text{TB}}$  phase (90°C)

| Atom             |                   | $^1\text{H}$ ( $\delta/\text{ppm}$ ) |                 | $^{13}\text{C}$ ( $\delta/\text{ppm}$ ) | $^1\text{H}$ ( $\delta/\text{ppm}$ ) | $\Delta\delta/\text{ppm}^c$ |
|------------------|-------------------|--------------------------------------|-----------------|-----------------------------------------|--------------------------------------|-----------------------------|
| <b>1</b>         | $\delta$          | 0.95 (6)                             | $\delta$        | 13.25                                   | 0.13                                 | 0.82                        |
|                  | $^3J_{\text{HH}}$ | 7.38 (t)                             | $J_{\text{CH}}$ | 125.25 (q)                              |                                      |                             |
| <b>2</b>         | $\delta$          | 1.46 (4)                             | $\delta$        | 18.33                                   | 0.60                                 | 0.86                        |
|                  | $^3J_{\text{HH}}$ | 7.42 (sextet)                        | $J_{\text{CH}}$ | 125.34 (t)                              |                                      |                             |
| <b>3</b>         | $\delta$          | 1.74 (4)                             | $\delta$        | 30.29                                   | 0.85                                 | 0.89                        |
|                  | $^3J_{\text{HH}}$ | 6.97 (pentet)                        | $J_{\text{CH}}$ | 125.31 (t)                              |                                      |                             |
| <b>4</b>         | $\delta$          | 4.09 (4)                             | $\delta$        | 67.55                                   | 3.00                                 | 1.09                        |
|                  | $^3J_{\text{HH}}$ | 6.48 (t)                             | $J_{\text{CH}}$ | 144.52 (t)                              |                                      |                             |
| <b>5</b>         | --                | ---                                  | $\delta$        | 163.06<br>s                             | ---                                  | ---                         |
| <b>6</b>         | $\delta$          | 7.09 (4)                             | $\delta$        | 114.49                                  | 6.02                                 | 1.07                        |
|                  | $^3J_{\text{HH}}$ | 8.88 (d)                             | $J_{\text{CH}}$ | 162.92 (d)                              |                                      |                             |
| <b>7</b>         | $\delta$          | 8.05 (4)                             | $\delta$        | 131.71                                  | 7.20                                 | 0.85                        |
|                  | $^3J_{\text{HH}}$ | 8.88 (d)                             | $J_{\text{CH}}$ | 163.08 (d)                              |                                      |                             |
| <b>8</b>         | --                | ---                                  | $\delta$        | 120.54<br>s                             | ---                                  | ---                         |
| <b>9</b>         | --                | ---                                  | $\delta$        | 163.69<br>s                             | ---                                  | ---                         |
| <b>10</b>        | --                | ---                                  | $\delta$        | 152.11<br>s                             | ---                                  | ---                         |
| <b>11</b>        | $\delta$          | 7.30 (4)                             | $\delta$        | 121.80                                  | 6.43                                 | 0.87                        |
|                  | $^3J_{\text{HH}}$ | 8.58 (d)                             | $J_{\text{CH}}$ | 164.50 (d)                              |                                      |                             |
| <b>12</b>        | $\delta$          | 7.79 (4)                             | $\delta$        | 128.59                                  | 6.91                                 | 0.88                        |
|                  | $^3J_{\text{HH}}$ | 8.58 (d)                             | $J_{\text{CH}}$ | 162.92 (d)                              |                                      |                             |
| <b>13</b>        | --                | ---                                  | $\delta$        | 133.71<br>s                             | ---                                  | ---                         |
| <b>14</b>        | $\delta$          | 8.34 (2)<br>s                        | $\delta$        | 159.07                                  | 7.37                                 | 0.97                        |
|                  |                   |                                      | $J_{\text{CH}}$ | 158.54 (d)                              |                                      |                             |
| <b>15</b>        | $\delta$          | 3.57 (4)                             | $\delta$        | 60.06                                   | 2.79                                 | 0.70                        |
|                  | $^3J_{\text{HH}}$ | 6.84 (t)                             | $J_{\text{CH}}$ | 131.27 (t)                              |                                      |                             |
| <b>16</b>        | $\delta$          | 1.64 (4)                             | $\delta$        | 30.10                                   | 0.96                                 | 0.68                        |
|                  | $^3J_{\text{HH}}$ | 6.76 (pentet)                        | $J_{\text{CH}}$ | 126.32 (t)                              |                                      |                             |
| <b>17 and 18</b> | $\delta$          | 1.34-1.40 (6)<br>m                   | $\delta$        | 26.38 and 28.21                         | 0.67                                 | 0.70                        |

<sup>a</sup> Referred to TMS. Number of protons in brackets. <sup>b</sup> (s) singlet, (d) doublet, (t) triplet, (q) quartet, (m) multiplet. <sup>c</sup>  $\delta/\text{ppm}(\text{solution}) - \delta/\text{ppm}(N_{\text{TB}}\text{phase})$

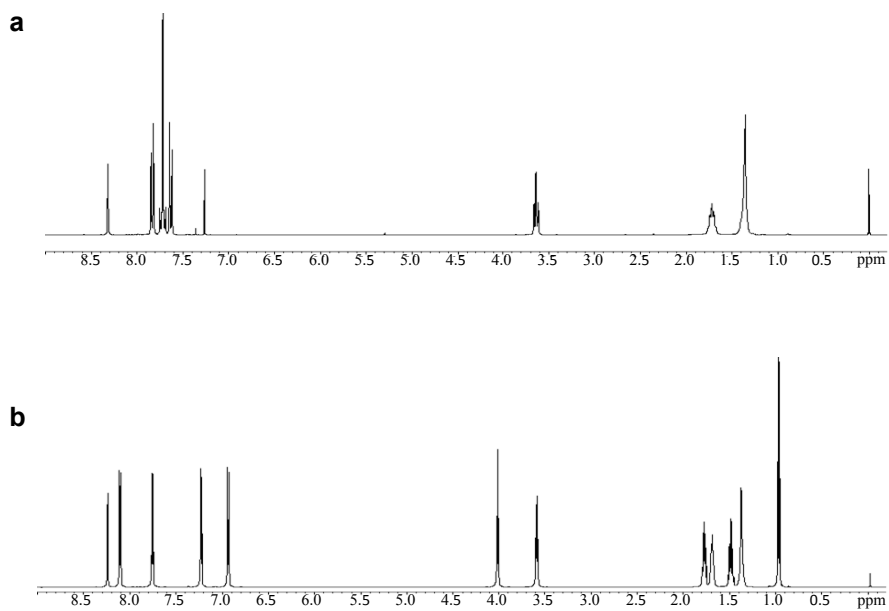

**Figure S2.**  $^1\text{H}$  NMR spectra of (a) **CBI-7-ICB** and (b) **BB\_7-4** in  $\text{CDCl}_3$  solution.

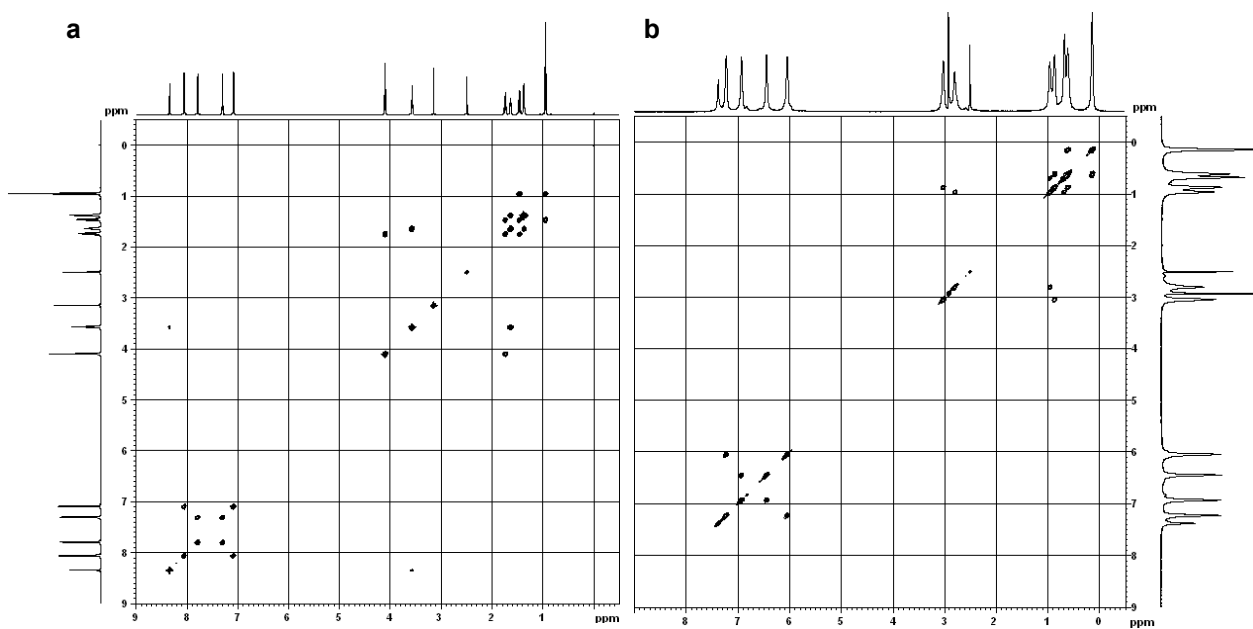

**Figure S3.** (a) COSY spectrum of **BB\_7-4** in  $\text{DMSO-}d_6$  solution, (b) COSY spectrum of the neat **BB\_7-4** in the  $N_{\text{TB}}$  phase at  $90\text{ }^\circ\text{C}$ ,

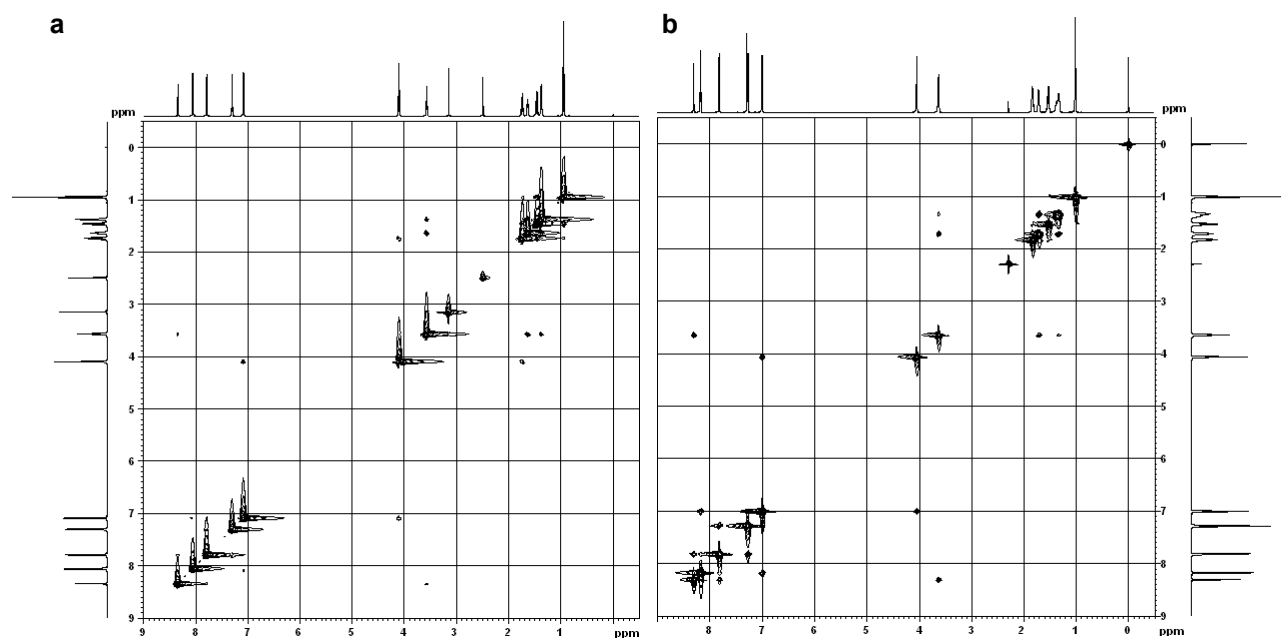

**Figure S4.** NOESY spectrum of **BB\_7-4** dissolved in (a) DMSO- $d_6$  at 50 °C (b) CDCl $_3$  at -40 °C

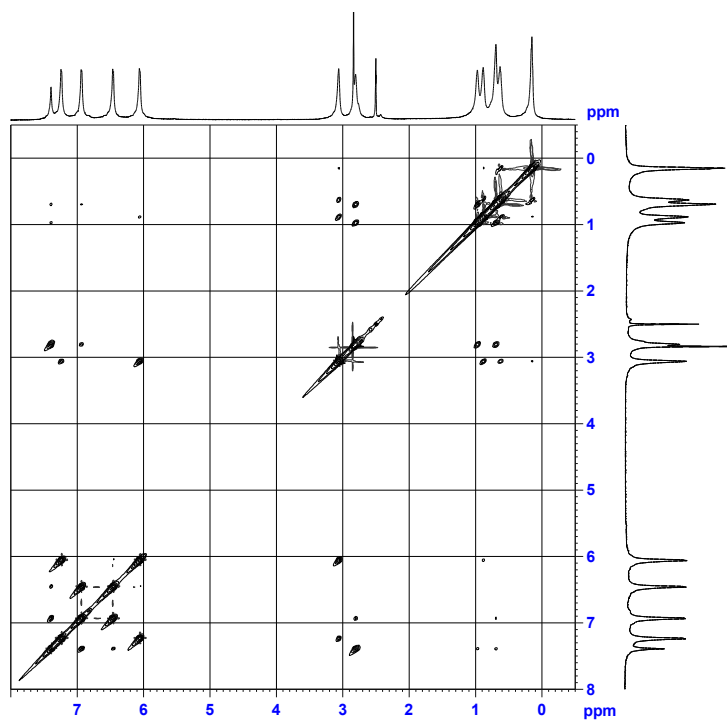

**Figure S5.** NOESY spectrum of the neat **BB\_7-4** at 100 °C
